# Supplementary material for: A fast, highly sensitive and selective assay of iodide ions with single-stranded DNA-templated copper nanoparticles as a fluorescent probe for its application in Kunming mice samples
Source: Royal Society of Chemistry journal article supplement (doi:10.1039/c7an00595d), 2017-01-01
Supplement: c7an00595d1.pdf [file c7an00595d1.pdf]

## Electronic Supplementary Information (ESI)

### Fast, highly sensitive and selective assay of iodide ions with single-stranded DNA-templated copper nanoparticles as a fluorescent probe for its application in Kunming mice samples

Zhenzhen Chen<sup>†</sup>, Yaxin Niu<sup>†</sup>, Guiying Cheng, Lili Tong, Guanglu Zhang, Feng Cai, Tingting Chen, Bao Liu, Bo Tang\*

*College of Chemistry, Chemical Engineering and Materials Science, Collaborative Innovation Center of Functionalized Probes for Chemical Imaging in Universities of Shandong, Key Laboratory of Molecular and Nano Probes, Ministry of Education, Shandong Provincial Key Laboratory Of Clean Production of Fine Chemicals, Shandong Normal University, Jinan 250014, P. R. China*

\*Corresponding Author, E-mail: tangb@sdsu.edu.cn

<sup>†</sup>Contributed equally to this work

#### The analytical parameters of the proposed method

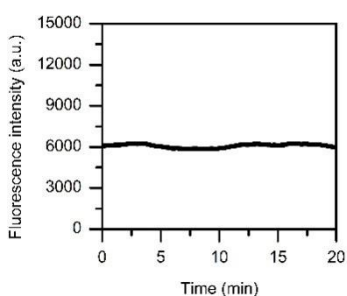

**Figure S1:** The fluorescence kinetics curve of ssDNA-CuNPs with iodide ion (25  $\mu$ M)

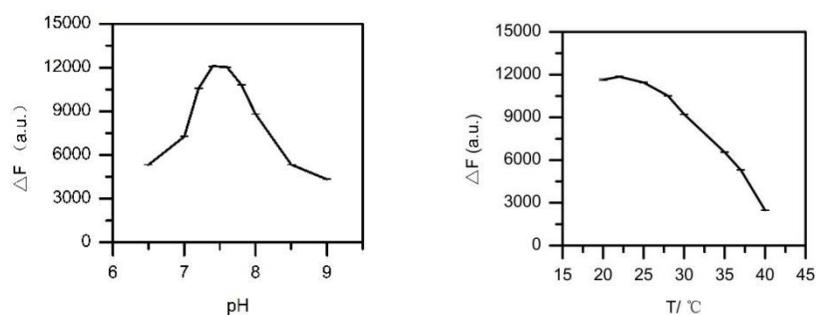

**Figure S2:** The effect of pH and temperature on reaction between ssDNA-CuNPs and iodide ion (60  $\mu\text{M}$ )

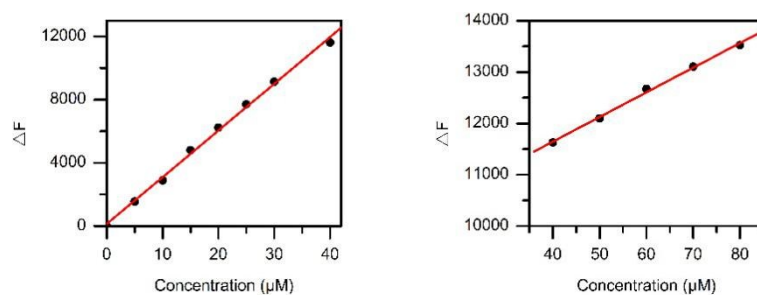

**Figure S3:** Calibration curve of the assay system for  $\text{I}^-$  detection.

#### Preparation of the animal model:

Male Kunming mice at 30 days of age were obtained from the Department of Laboratory Animal Science, Shandong University (Jinan, China). All mice were maintained in an AAALAC accredited facility, and all work with mice followed National Institutes of Health guidelines was approved by the Animal Care Committee of Shandong University (Approved protocol No. 20161002). We obtained male Kunming mice model and determined the  $\text{I}^-$  content.

#### References

- L.-L. Zhang, J.-J. Zhao, H. Zhang, J.-H. Jiang and R.-Q. Yu, 2013, *Biosens. Bioelectron.*, **44**, 6-9.
- Y.-P. Zhong, Q.-P. Wang, Y. He, Y.-L. Ge and G.-W. Song, 2015, *Sensor. Actuat.*, **209**, 147-153.
- L. Zhang, Q.-Y. Cai, J. Li, J. Ge, J.-Y. Wang, Z.-Z. Dong and Z.-H. Li, 2015, *Biosens. Bioelectron.*, **69**, 77-82.
- Z.-H. Qing, X.-X. He, D.-G. He, K.-M. Wang, F.-Z. Xu, T.-P. Qing and X. Yang, 2013, *Angew. Chem.* **52**, 9719-9722.
